# Supplementary material for: Molecular Biomarker of Drug Resistance Developed From Patient-Derived Organoids Predicts Survival of Colorectal Cancer Patients
Source: PubMed Central journal article supplement (PMC9004628; doi:10.3389/fonc.2022.855674), 2022-03-29
Supplement: DataSheet_1.pdf [file DataSheet_1.pdf]

# Lifeng Chen, et al. Figure S1A

## Afu\_Sen - Bfu\_Res

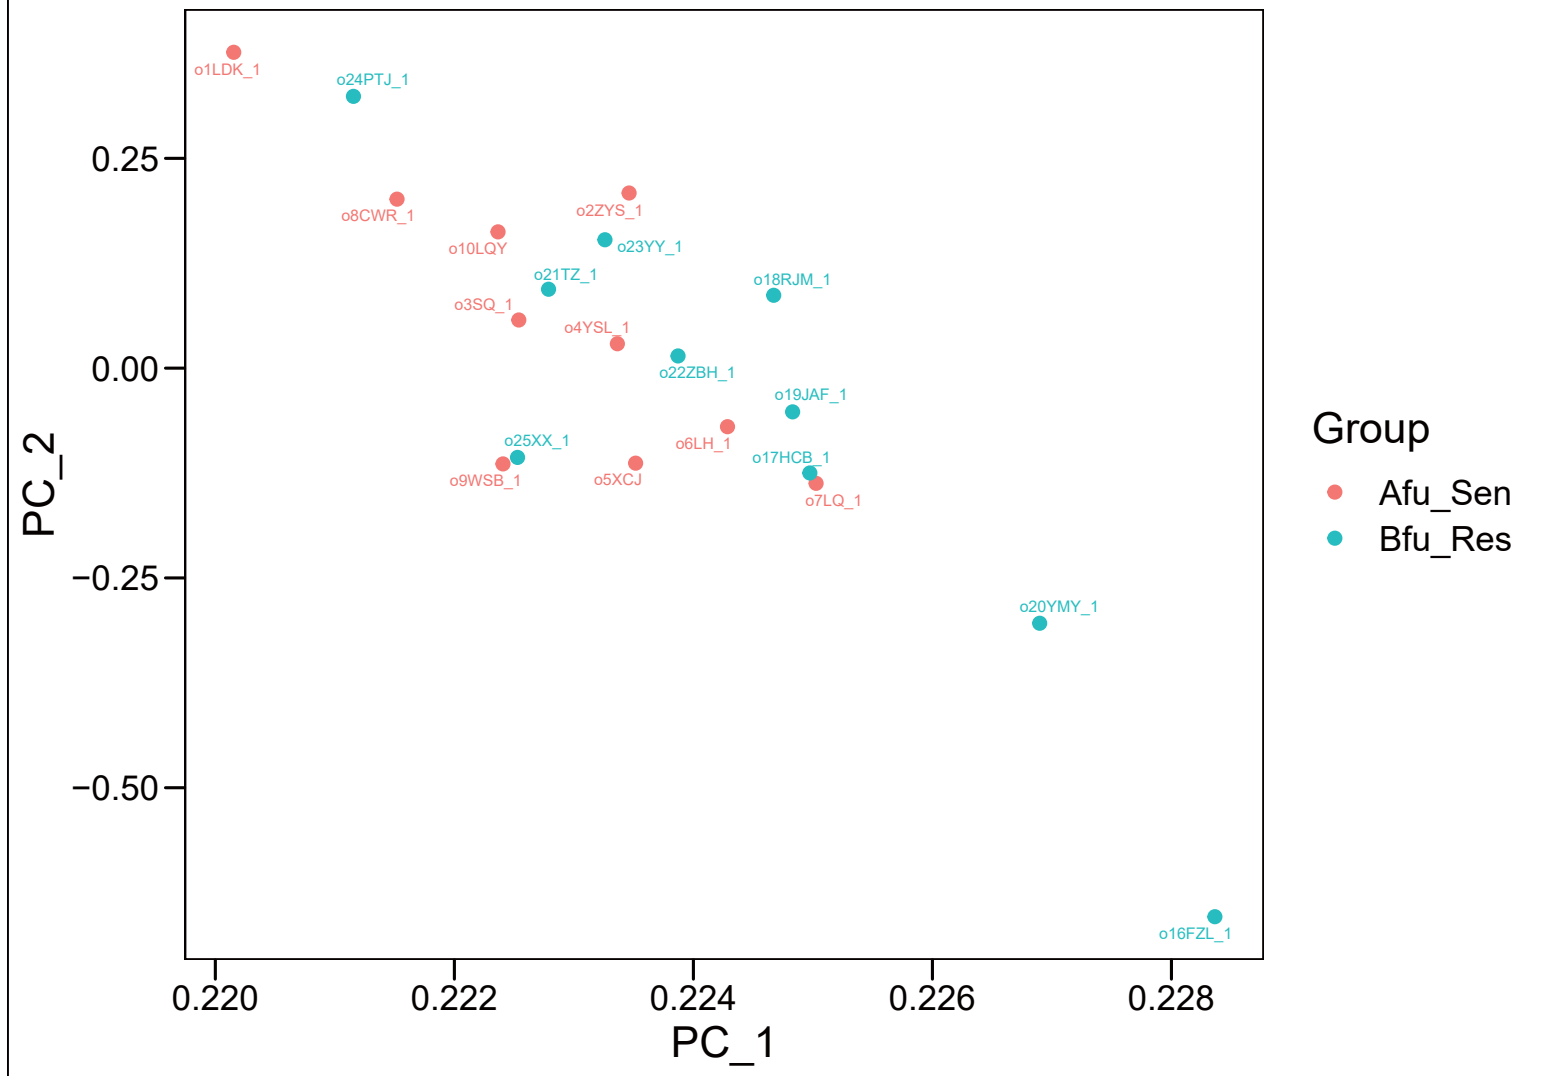

# Lifeng Chen, et al. Figure S1B

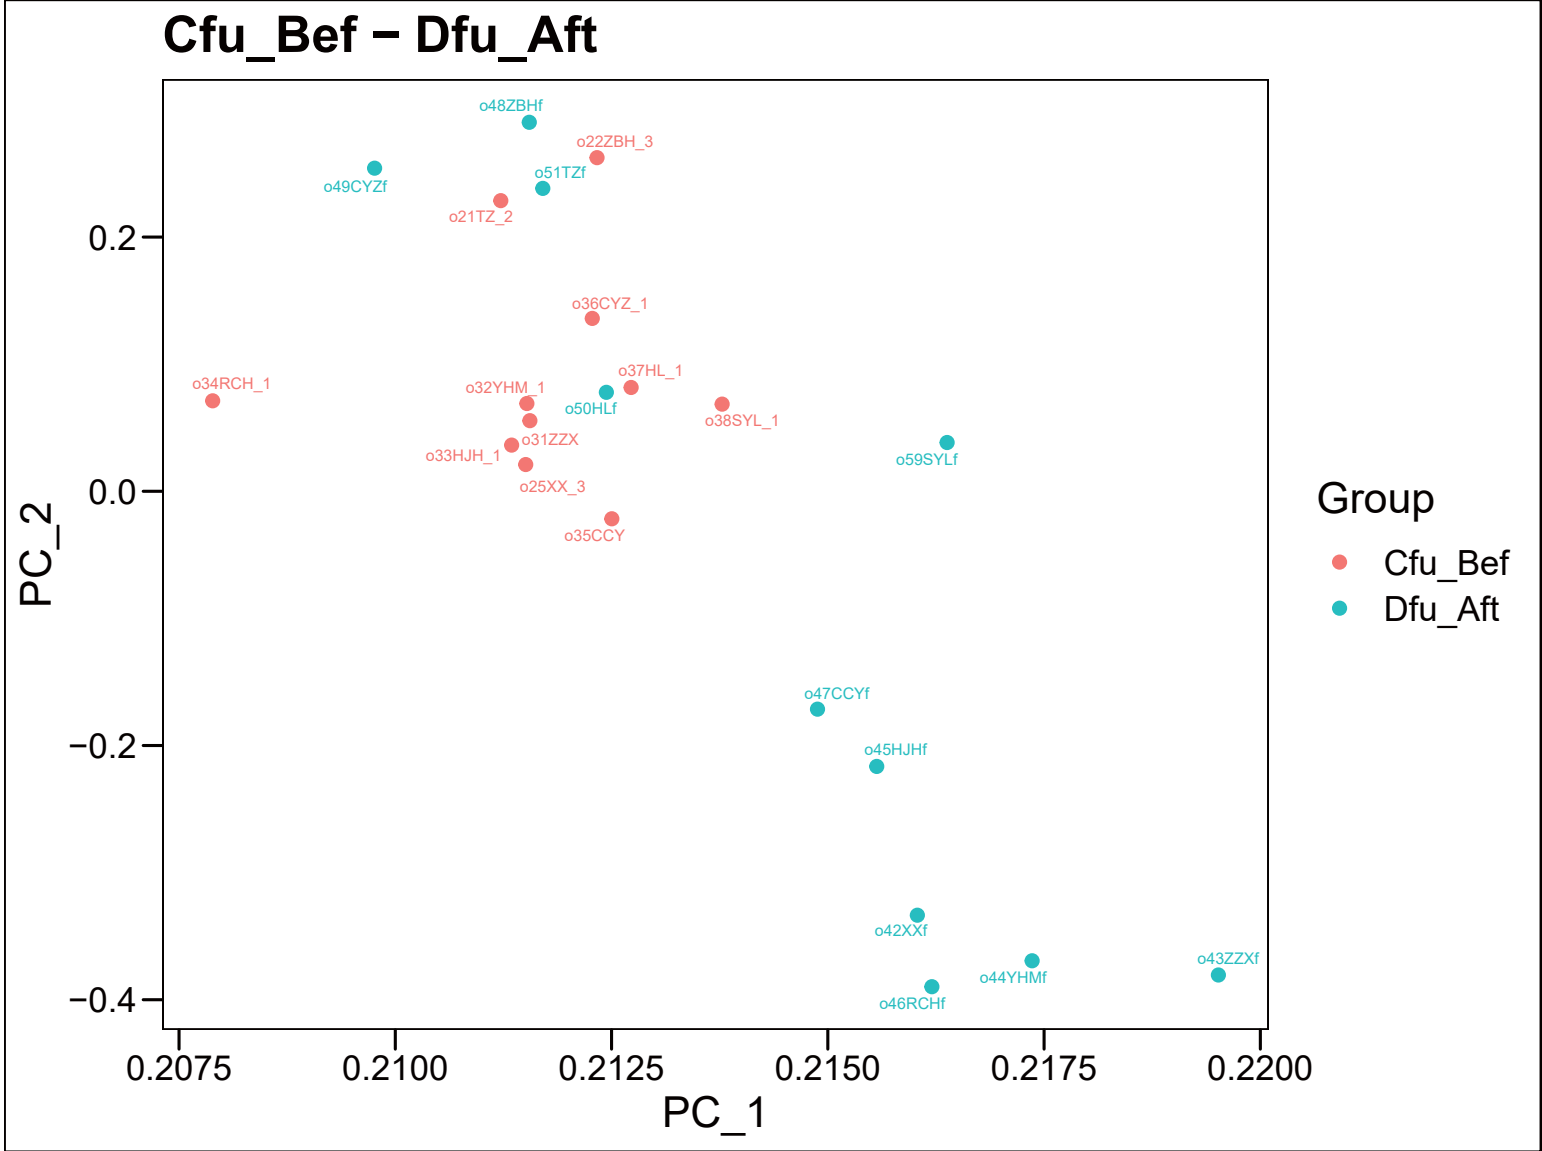

**Figure S1.** Principal component analysis (PCA) showed high degree of similarity between group A/B and C/D, respectively. Group A: 5-Fu sensitive untreated CRCOs; Group B: 5-Fu resistant untreated CRCOs; Group C: CRCOs before 5-Fu treatment; Group D: surviving CRCOs after 5-Fu treatment.
