# Supplementary material for: Molecular Biomarker of Drug Resistance Developed From Patient-Derived Organoids Predicts Survival of Colorectal Cancer Patients
Source: PubMed Central journal article supplement (PMC9004628; doi:10.3389/fonc.2022.855674), 2022-03-29
Supplement: DataSheet_2.pdf [file DataSheet_2.pdf]

# Lifeng Chen, et al. Figure S2

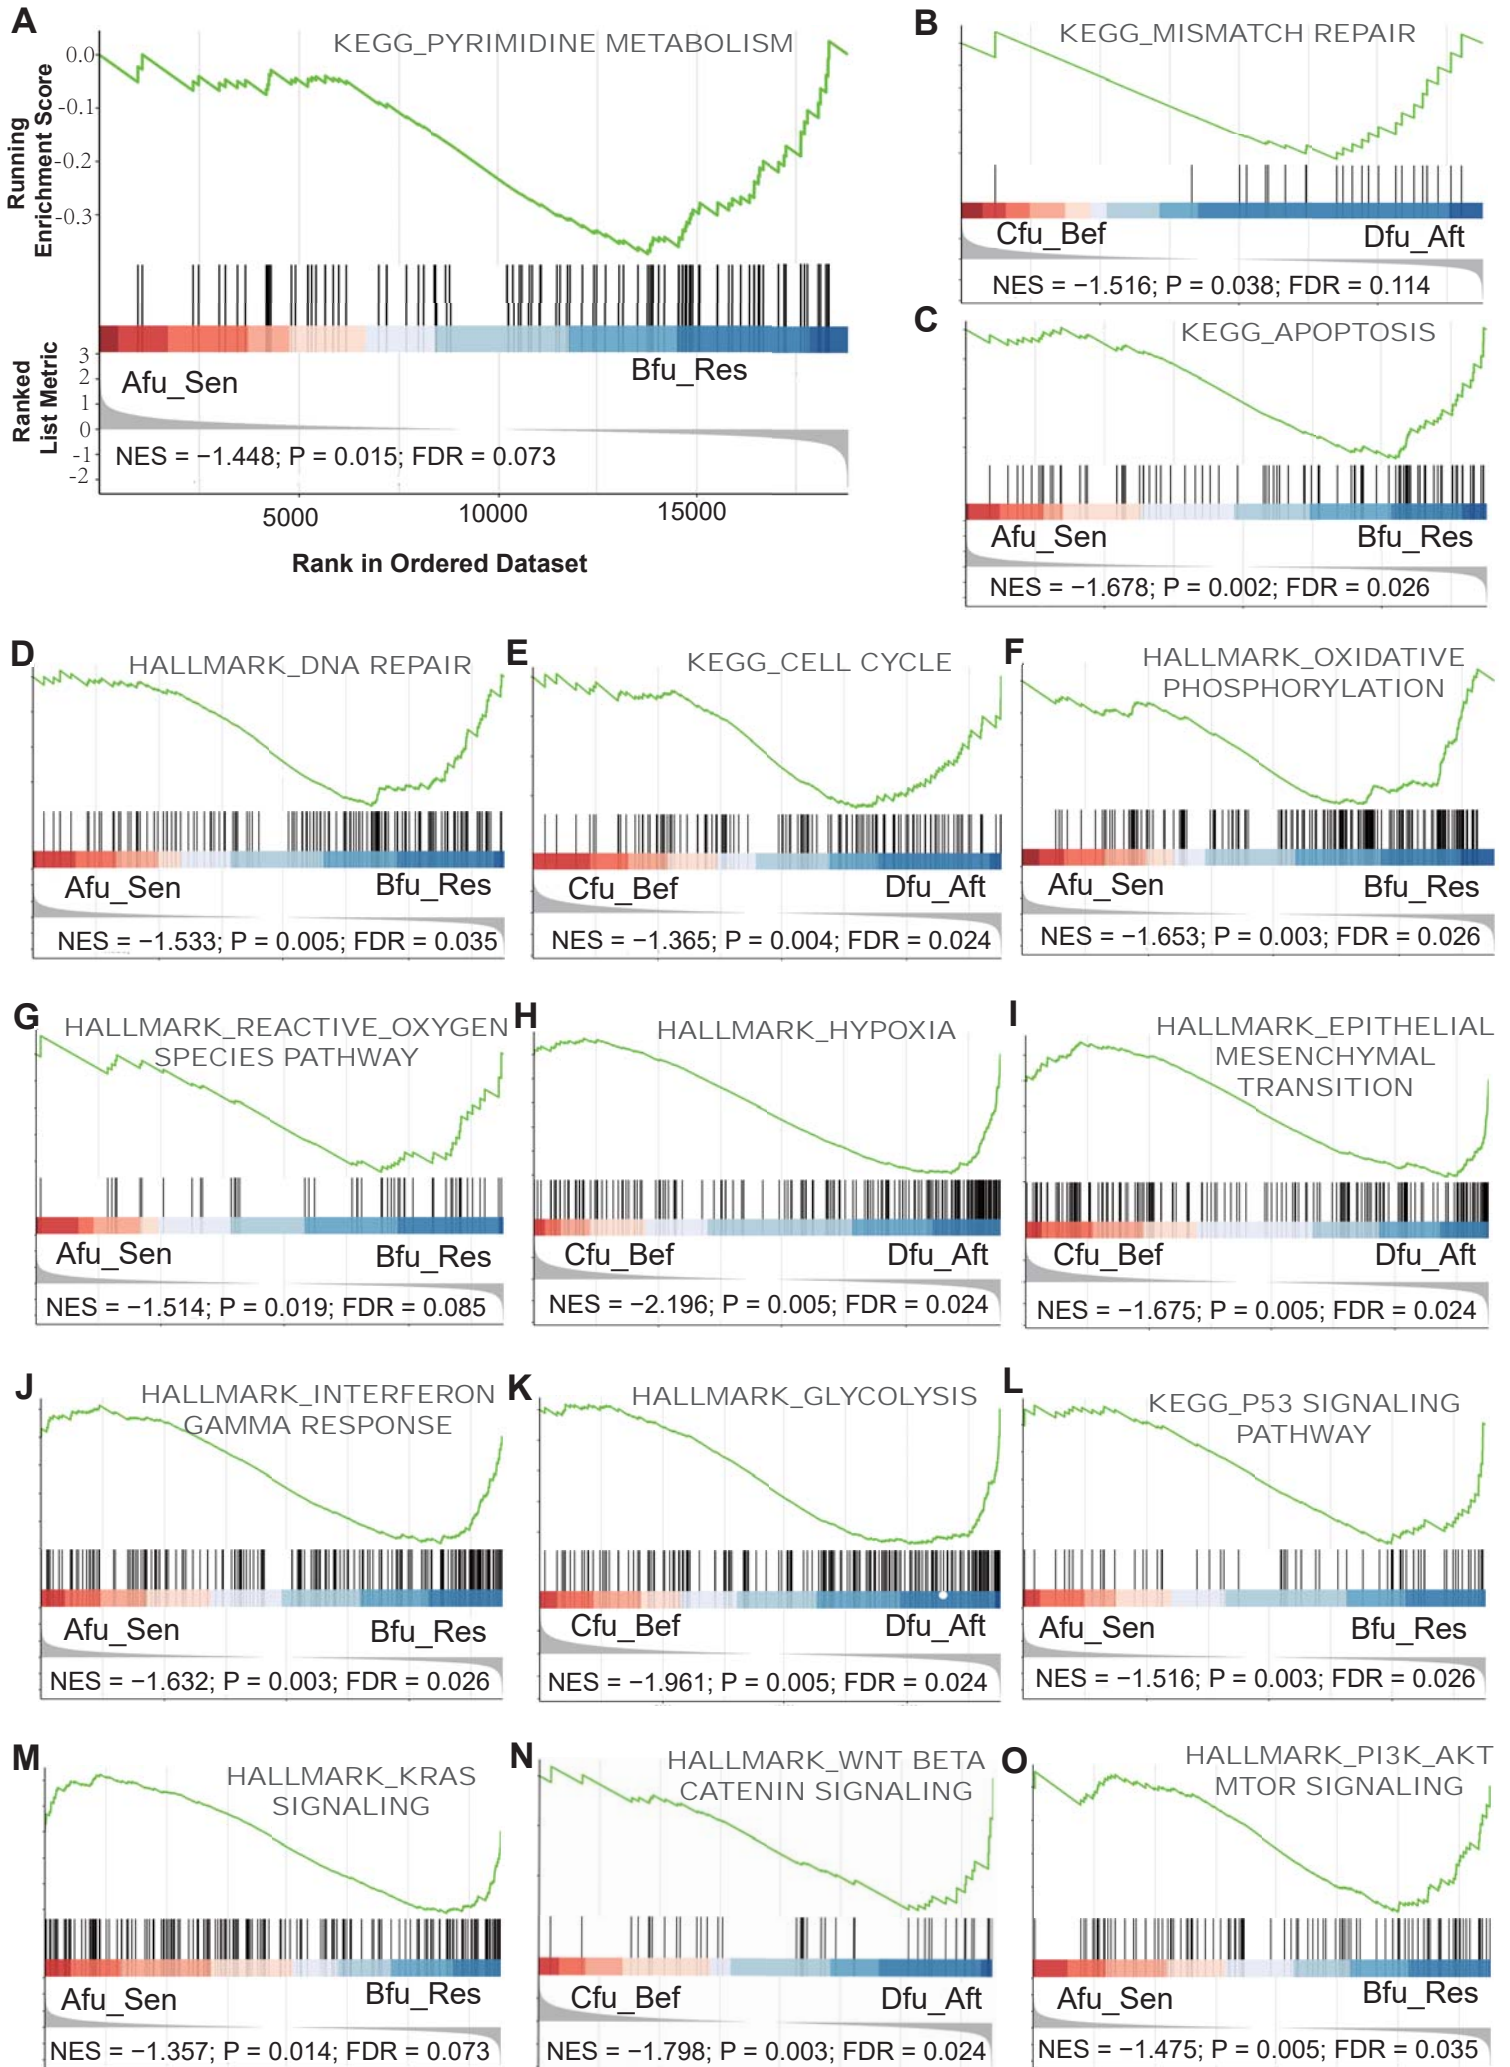

**Fig. S2** Enrichment plots of GSEA for well-proven pathways regarding 5-Fu resistance discovered in current analysis. **a** Enrichment plot for pyrimidine metabolic pathway. **b-o** Enrichment plots for mismatch repair, apoptosis, DNA repair, cell cycle, oxidative phosphorylation, reactive oxygen species pathway, hypoxia, epithelial mesenchymal transition, interferon gamma response, glycolysis, P53 signaling, KRAS signaling, WNT beta catenin signaling and PI3K-AKT-MTOR signaling pathways.
